# Supplementary material for: Socioeconomic inequalities and vaccination coverage: results of an immunisation coverage survey in 27 Brazilian capitals, 2007–2008
Source: PubMed Central journal article supplement — J Epidemiol Community Health. 2012 Jan 19;66(10):934–41. doi: 10.1136/jech-2011-200341 (PMC3433223; doi:10.1136/jech-2011-200341), 2012-01-19
Supplement: jech-2011-200341-s1.pdf [file jech-2011-200341-s1.pdf]

**Webappendix Table 1.** Characteristics of census tracts in 27 major Brazilian cities, according to socioeconomic quintile.

| Characteristic                                                             | Socioeconomic quintile according to census tract characteristics* |               |               |               |               |
|----------------------------------------------------------------------------|-------------------------------------------------------------------|---------------|---------------|---------------|---------------|
|                                                                            | A (highest)                                                       | B             | C             | D             | E (lowest)    |
| Average census tract head of household monthly income in US\$, median, IQR | 1375 (958-1930)                                                   | 617 (498-826) | 382 (293-488) | 255 (213-306) | 194 (156-246) |
| % head of household with $\geq 17$ years education                         | 5.6 (3.7-10.0)                                                    | 1.8 (1.1-2.6) | 0.6 (0.5-1.0) | 0.4 (0.3-0.6) | 0.1 (0.1-0.2) |
| % head of household with income $> 20$ minimum wage                        | 5.3 (3.4-9.8)                                                     | 1.3 (0.7-2.9) | 1.3 (0.7-2.9) | 0.5 (0.3-0.9) | 0.1 (0.3-0.0) |

\* Socioeconomic characteristics of census tracts were based on 2000 Brazilian census data. Socioeconomic quintiles were based on rank of census tract according to average head of household income, percent heads of household with 17 or more years of education and percent heads of household with income greater than 20 times the minimum wage. See Methods.

**Webappendix Table 2.** Description of survey sample in 27 Brazilian capital cities.

| Region<br>Capital, State | Registered<br>births,<br>2005 | Number<br>of clusters<br>selected | Number of<br>census<br>tracts<br>sampled<br>(% total) | Children<br>enrolled<br>(% target) | Average<br>census tract<br>head of<br>household<br>monthly<br>income in<br>US\$*, median,<br>(IQR) |       |
|--------------------------|-------------------------------|-----------------------------------|-------------------------------------------------------|------------------------------------|----------------------------------------------------------------------------------------------------|-------|
| <b>Southeast</b>         |                               |                                   |                                                       |                                    |                                                                                                    |       |
| São Paulo, SP            | 179025                        | 150                               | 275 (2.1)                                             | 778 (74.1)                         | 1441                                                                                               | (147) |
| Rio de Janeiro, RJ       | 84228                         | 150                               | 247 (3.0)                                             | 765 (72.9)                         | 1001                                                                                               | (130) |
| Vitória, ES              | 4324                          | 90                                | 134 (49.3)                                            | 418 (66.3)                         | 1007                                                                                               | (126) |
| Belo Horizonte, MG       | 32097                         | 150                               | 118 (4.6)                                             | 941 (89.6)                         | 984                                                                                                | (115) |
| <b>South</b>             |                               |                                   |                                                       |                                    |                                                                                                    |       |
| Curitiba, PR             | 24547                         | 150                               | 217 (10.3)                                            | 899 (85.6)                         | 921                                                                                                | (141) |
| Florianópolis, SC        | 4961                          | 90                                | 132 (28.7)                                            | 531 (84.3)                         | 1016                                                                                               | (179) |
| Porto Alegre, RS         | 18943                         | 150                               | 270 (12.6)                                            | 812 (77.3)                         | 931                                                                                                | (161) |
| <b>Central-west</b>      |                               |                                   |                                                       |                                    |                                                                                                    |       |
| Brasília, DF             | 45917                         | 150                               | 211 (8.4)                                             | 998 (95.1)                         | 1126                                                                                               | (110) |
| Goiânia, GO              | 19621                         | 150                               | 200 (18.6)                                            | 815 (77.6)                         | 799                                                                                                | (106) |
| Cuiabá, MT               | 9601                          | 90                                | 118 (23.3)                                            | 548 (87.0)                         | 735                                                                                                | (123) |
| Campo Grande, MS         | 12316                         | 90                                | 124 (18.4)                                            | 628 (99.7)                         | 693                                                                                                | (99)  |
| <b>North</b>             |                               |                                   |                                                       |                                    |                                                                                                    |       |
| Palmas, TO               | 3828                          | 90                                | 100 (80.7)                                            | 585 (92.9)                         | 592                                                                                                | (101) |
| Belém, PA                | 23557                         | 90                                | 125 (10.6)                                            | 621 (98.6)                         | 639                                                                                                | (91)  |
| Manaus, AM               | 38022                         | 90                                | 122 (7.9)                                             | 625 (99.2)                         | 586                                                                                                | (94)  |
| Boa Vista, RR            | 6006                          | 60                                | 72 (28.8)                                             | 419 (99.8)                         | 472                                                                                                | (109) |
| Macapá, AP               | 8422                          | 60                                | 61 (33.9)                                             | 380 (90.5)                         | 475                                                                                                | (104) |
| Rio Branco, AC           | 7288                          | 60                                | 67 (30.9)                                             | 419 (99.8)                         | 436                                                                                                | (88)  |
| Porto Velho, RO          | 7670                          | 60                                | 82 (27.1)                                             | 420 (100)                          | 538                                                                                                | (123) |
| <b>Northeast</b>         |                               |                                   |                                                       |                                    |                                                                                                    |       |
| Salvador, BA             | 37603                         | 150                               | 265 (10.6)                                            | 761 (72.5)                         | 874                                                                                                | (92)  |
| Aracaju, SE              | 9383                          | 90                                | 130 (25.9)                                            | 601 (95.4)                         | 611                                                                                                | (117) |
| Recife, PE               | 23207                         | 150                               | 173 (14.4)                                            | 875 (83.3)                         | 815                                                                                                | (74)  |
| Maceió, AL               | 16513                         | 90                                | 130 (19.5)                                            | 603 (95.7)                         | 504                                                                                                | (135) |
| João Pessoa, PB          | 11682                         | 90                                | 112 (19.2)                                            | 572 (90.8)                         | 702                                                                                                | (76)  |
| Natal, RN                | 13718                         | 90                                | 106 (19.5)                                            | 604 (95.9)                         | 661                                                                                                | (84)  |
| Fortaleza, CE            | 38905                         | 150                               | 258 (12.8)                                            | 1006 (95.9)                        | 837                                                                                                | (81)  |
| Teresina, PI             | 14290                         | 90                                | 98 (15.1)                                             | 564 (89.5)                         | 522                                                                                                | (61)  |
| São Luiz, MA             | 17836                         | 90                                | 89 (11.5)                                             | 561 (89.1)                         | 608                                                                                                | (68)  |
| <b>Total</b>             | 713510                        | 2910                              | 4009                                                  | 17749 (87.1)                       | 733                                                                                                | (103) |

SP=São Paulo, RJ=Rio de Janeiro, ES=Espirito Santo, MG=Minas Gerais, PR=Paraná, SC=Santa Catarina, RS=Rio Grande do Sul, DF=Distrito Federal, GO=Goáís, MT=Mato Grosso, MS=Mato Grosso do Sul, TO=Tocantins, PA=Pará, AM=Amazonas, RR=Roraima, AP=Amapá, AC=Acre, RO=Roraima, BA=Bahia, SE=Sergipe, PE=Pernambuco, AL=Alagoas, PB=Paraíba, RN=Rio Grande do Norte, CE=Ceará, PI=Piauí, MA=Maranhão.

**Webappendix Table 3.** Percent of children who had received none, some or all of the recommended infant immunisations by 18 months of age, in 27 Brazilian capital cities, 2007-2008.

| Variables                                                    | None of recommended vaccinations (N=123) | Incompletely immunised (N=2634) | Completely immunised (N=14538) |
|--------------------------------------------------------------|------------------------------------------|---------------------------------|--------------------------------|
|                                                              | % (n)                                    | % (n)                           | % (n)                          |
| <b>Gender of child</b>                                       |                                          |                                 |                                |
| Male                                                         | 0.8 (58)                                 | 16.1 (1366)                     | 83.1 (7433)                    |
| Female                                                       | 0.7 (65)                                 | 16.6 (1267)                     | 82.7 (7103)                    |
| <b>Child's birth order</b>                                   |                                          |                                 |                                |
| 1 <sup>st</sup>                                              | 0.7 (71)                                 | 14.2 (1088)                     | 85.1 ( 7167)                   |
| 2nd                                                          | 0.7 (35)                                 | 17.0 (794)                      | 82.4 (4337)                    |
| 3rd or higher                                                | 0.8 (17)                                 | 20.3 (734)                      | 78.9 ( 2990)                   |
| <b>Socioeconomic quintile of residence census tract</b>      |                                          |                                 |                                |
| A-highest                                                    | 1.0 (28)                                 | 21.4 (503)                      | 77.5 (2271)                    |
| B-upper-middle                                               | 0.6 (32)                                 | 12.6 (434)                      | 86.7 (2868)                    |
| C-middle                                                     | 1.1 (22)                                 | 14.9 (498)                      | 83.9 (3073)                    |
| D-lower-middle                                               | 0.7 (17)                                 | 16.2 (584)                      | 83.1 (3122)                    |
| E-lowest                                                     | 0.5 (24)                                 | 17.8 (615)                      | 81.7 (3204)                    |
| <b>Household economic classification (score)<sup>1</sup></b> |                                          |                                 |                                |
| Highest (13 to 18)                                           | 0.9 (42)                                 | 15.2 (589)                      | 83.9 (3882)                    |
| Upper-middle (9 to 12)                                       | 0.7 (29)                                 | 16.4 (561)                      | 82.9 (3324)                    |
| Middle (6 to 8)                                              | 0.6 (23)                                 | 16.4 (688)                      | 82.9 (3621)                    |
| Lower-middle (3 to 5)                                        | 0.7 (6)                                  | 19.8 (275)                      | 79.5 (1155)                    |
| Lowest (0 to 2)                                              | 0.8 (23)                                 | 16.9 (521)                      | 82.3 (2556)                    |
| <b>Household crowding</b>                                    |                                          |                                 |                                |
| Yes (>1 person per room)                                     | 0.6 (38)                                 | 16.8 (1270)                     | 82.5 (6399)                    |
| No                                                           | 0.9 (84)                                 | 15.8 (1327)                     | 83.3 (8030)                    |
| <b>Presence of grandmother in household</b>                  |                                          |                                 |                                |
| Yes                                                          | 0.7 (46)                                 | 16.8 (847)                      | 82.4 (4741)                    |
| No                                                           | 0.8 (76)                                 | 15.2 (1778)                     | 84.0 (9770)                    |
| <b>Single parent household</b>                               |                                          |                                 |                                |
| Yes                                                          | 0.9 (82)                                 | 16.3 (1998)                     | 82.8 (11126)                   |
| No                                                           | 0.7 (39)                                 | 16.4 (627)                      | 82.9 (3382)                    |
| <b>Mother's education</b>                                    |                                          |                                 |                                |
| 0 to 3 years                                                 | -                                        | 23.5 (158)                      | 76.5 (523)                     |
| 4 to 11 years                                                | 0.7 (81)                                 | 15.9 (1740)                     | 83.3 (9574)                    |
| 12 or more years                                             | 0.8 (39)                                 | 16.2 (702)                      | 82.9 (4327)                    |
| <b>Mother employed outside home</b>                          |                                          |                                 |                                |
| Yes                                                          | 1.0 (76)                                 | 16.2 (1107)                     | 82.9 (6393)                    |
| No                                                           | 0.6 (46)                                 | 16.5 (1516)                     | 82.9 (8095)                    |

<sup>1</sup> According to the Brazilian Economic Classification Criteria.

**Webappendix Table 4.** Results of stratified analysis of factors associated with incomplete vaccination by 18 months of age, by socioeconomic quintile of residence census tract in 27 Brazilian capitals cities, 2007-2008.

| Factors                                                      | Socioeconomic quintile of residence census tract |                  |                |                  |            |                  |                |                  |            |                  |
|--------------------------------------------------------------|--------------------------------------------------|------------------|----------------|------------------|------------|------------------|----------------|------------------|------------|------------------|
|                                                              | A highest                                        |                  | B upper middle |                  | C middle   |                  | D lower middle |                  | E lowest   |                  |
|                                                              | Incomplete                                       | aOR <sup>1</sup> | Incomplete     | aOR <sup>1</sup> | Incomplete | aOR <sup>1</sup> | Incomplete     | aOR <sup>1</sup> | Incomplete | aOR <sup>1</sup> |
| <b>Household economic classification (score)<sup>2</sup></b> |                                                  |                  |                |                  |            |                  |                |                  |            |                  |
| Highest (13 to 18)                                           | 18.3                                             | 1.0              | 10.3           | 1.0              | 9.7        | 1.0              | 9.9            | 1.0              | 11.6       | 1.0              |
| Upper-middle (9 to 12)                                       | 16.5                                             | 0.9              | 13.1           | 1.2              | 14.7       | 1.6*             | 13.8           | 1.0              | 14.9       | 1.6              |
| Middle (6 to 8)                                              | 19.0                                             | 1.0              | 13.2           | 1.7*             | 15.9       | 1.1              | 16.7           | 1.2              | 16.1       | 1.3              |
| Lower-middle (3 to 5)                                        | 18.8                                             | 0.8              | 16.4           | 2.0              | 17.6       | 1.1              | 23.7           | 2.0*             | 17.3       | 1.1              |
| Lowest (0 to 2)                                              | 18.5                                             | 0.8              | 18.5           | 1.8*             | 14.2       | 1.3              | 16.1           | 1.0              | 18.2       | 1.3              |
| <b>Household crowding</b>                                    |                                                  |                  |                |                  |            |                  |                |                  |            |                  |
| Yes                                                          | 18.5                                             | 0.8              | 14.7           | 0.7*             | 12.7       | 1.1              | 17.8           | 1.2              | 17.1       | 1.1              |
| No                                                           | 18.0                                             | 1.0              | 12.1           | 1.0              | 15.1       | 1.0              | 13.3           | 1.0              | 14.4       | 1.0              |
| <b>Presence of grandmother in household</b>                  |                                                  |                  |                |                  |            |                  |                |                  |            |                  |
| Yes                                                          | 16.1                                             | 1.0              | 12.7           | 1.0              | 14.3       | 1.0              | 17.2           | 1.0              | 15.6       | 1.0              |
| No                                                           | 18.8                                             | 1.2              | 13.3           | 1.0              | 13.8       | 1.0              | 15.1           | 0.9              | 16.3       | 1.2              |
| <b>Mother's education</b>                                    |                                                  |                  |                |                  |            |                  |                |                  |            |                  |
| 0 to 3 years                                                 | 18.9                                             | 0.9              | 28.0           | 1.5              | 23.5       | 1.2              | 23.3           | 1.0              | 22.1       | 1.7              |
| 4 to 11 years                                                | 16.4                                             | 0.7              | 13.8           | 0.9              | 14.6       | 1.1              | 16.0           | 1.1              | 16.1       | 1.0              |
| 12 or more years                                             | 18.9                                             | 1.0              | 11.2           | 1.0              | 11.1       | 1.0              | 12.1           | 1.0              | 12.3       | 1.0              |
| <b>Child's birth order</b>                                   |                                                  |                  |                |                  |            |                  |                |                  |            |                  |
| 1 <sup>st</sup>                                              | 16.6                                             | 1.0              | 10.5           | 1.0              | 12.8       | 1.0              | 12.7           | 1.0              | 13.6       | 1.0              |
| 2 <sup>nd</sup>                                              | 19.0                                             | 1.4              | 14.3           | 1.4              | 12.0       | 1.1              | 16.6           | 1.6*             | 16.0       | 1.0              |
| 3rd or higher                                                | 21.5                                             | 1.4              | 18.5           | 2.2*             | 19.2       | 1.6*             | 20.2           | 1.6*             | 19.7       | 1.0              |

Note. aOR = adjusted Odds Ratio, \*p<0.05.

<sup>1</sup> Adjusted Odds Ratios from five logistic regression models (one for each socioeconomic quintile of residence census tract) comparing incompletely vaccinated children to completely vaccinated children and including the independent variables shown in the table. Children who had received none of the recommended vaccines were excluded.

<sup>2</sup> According to the Brazilian Economic Classification Criteria.
